# Supplementary material for: Exogenous applications of brassinosteroids promote secondary xylem differentiation in Eucalyptus grandis
Source: PeerJ. 2024 Jan 2;12:e16250. doi: 10.7717/peerj.16250 (PMC10768668; doi:10.7717/peerj.16250)
Supplement: Supplemental Information 3 [file peerj-12-16250-s003.xlsx]

## Sheet: Table 1  
Table 1 Primers of BR biosynthetic and signaling genes used for qRT-PCR
Gene	Molecular function	Gene ID	Primer sequences(Forward/reverse)
EgrDET2	steroid 5-alpha-reductase	Eucgr.D02079	TTTCGGAGAGCGAAAGGAGG/GCTTGATCTGATGCGCAGTG
EgrDWF4	Cytochrome P450 90B1	Eucgr.I02453	CCCGATGAGGCCTTCGCCTT/TGAGAGGTAGGGGAGGGGTGAA
EgrDWF5	Sterol delta-7 reductase	Eucgr.F04028	AAGCGAAGACCGTGCACTCG/AGACCCATCAGCATGCACCA
EgrCPD	cytochrome P450, family 90, subfamily A, polypeptide 1	Eucgr.G03059	GCACGACAGACACTTATCCG/GGGTGGTCGGGAAGAATACC
EgrBZR1	BRASSINAZOLE-RESISTANT 1-RELATED	Eucgr.F01541	AAGAAGACGGCACCACCTAT/GGGTTCTGCGAAGAGTATGG
EgrBZR2	BRASSINAZOLE-RESISTANT 1-RELATED	Eucgr.H01239	AAGCCGGTTGGGTCGTTGA/GGACTGCGGACTCGGTTGAT
EgrBRI1	brassinosteroid insensitive 1	Eucgr.I00303	GGAAGAAGAGGGAAAGGAAA/ AGCAGCAGGTCGGTGAAGAG
EgrBAK1	brassinosteroid insensitive 1-associated receptor kinase 1	Eucgr.I02690	ATGCTTCGGATTTCTTGGCG/CTAGCACCTGTTGTTTCCACA

## Sheet: Table 2
Table 2 Primers of xylem development related genes used for qRT-PCR
Gene	Molecular function	Gene ID	Primer sequences(Forward/reverse)
EgrHB8	Homebox gene 8	Eucgr.C00605	TGCCCGAAGCCGAGTTCAC/CTGCCTGAAGGCGAGATGCTT
EgrMYB83	MYB domain protien 83	Eucgr.G03385	GTGGTGCCTTCTCTCCGCAA/AGACGTGCTGCAATCTGGGA
EgrPAL	Phenylalanine ammonia-lyase	Eucgr.G02848	GGCCGGTACCATCTCGGTCA/ACCCATATGACAGAACCCACGA
EgrVND6	Vascular-related NAC domain 6	Eucgr.D02027	CATGTTCCTCCCGGCTTCAGA/CTTGTCTTGAAGATCCCAGGGC
EgrSND1	Secondary wall-associated NAC domain 1	Eucgr.K02185	CTCCAAGACTGGCCCGCAAA/TCTGCCAATGGATGGAACGGT
EgrPHB	PHABULOSA	Eucgr.K01066	TCTACGATGTACGAGCACGACC/TGGTCGGGTACAGGACGAGT
EgrPHV	PHAVOLUTA	Eucgr.D00184	GCTGGAGCGGGTCTACAACG/TCCTTCCTCTGCTTTTCCCGAC
EgrREV	REVOLUTA	Eucgr.B02504	CAGCTGATTCGGGAGTGCCC/AGCTTGTTCATGGCCGTCAGT
EgrCESA1	Cellulose synthase A catalytic subunit 1	Eucgr.C01769	CTTGCCGTGGATTACCCTGT/ GCTTCTTGCAGAAAGGCACC
EgrCESA3	Cellulose synthase A catalytic subunit 3	Eucgr.J01278	GGGGTTGAAGGTGCTGGATT/ AACAGCAGACTGACCGAACC
EgrCESA4	Cellulose synthase A catalytic subunit 4	Eucgr.A01324	CAAGTCCATCCGAACGGTCA/ ATCGTCCTTGCCCACTAAGC
EgrCESA7	Cellulose synthase A catalytic subunit 7	Eucgr.C00246	GTGATTCACGGCCATGAGGA/ GACAAACCGGAAATCCGCAC
